# Supplementary material
Source: PubMed Central journal article supplement (PMC10969535)
Supplement: supplemental_figure_s1_cwad095.pdf [file supplemental_figure_s1_cwad095.pdf]

A

|                             | Number of exon-exon junction reads |     |     |     |     |     | Total reads | Uniquely mapped reads |
|-----------------------------|------------------------------------|-----|-----|-----|-----|-----|-------------|-----------------------|
|                             | 2:3                                | 2:4 | 2:5 | 3:4 | 3:5 | 4:5 |             |                       |
| Cerebral Cortex replicate 1 | 34                                 | 4   | 5   | 38  | 0   | 34  | 311,361,602 | 273,912,120           |
| Cerebral Cortex replicate 2 | 49                                 | 2   | 9   | 69  | 0   | 49  | 332,376,202 | 286,174,468           |
| Spleen replicate 1          | 4                                  | 3   | 113 | 3   | 1   | 10  | 148,209,846 | 129,420,758           |
| Spleen replicate 2          | 11                                 | 2   | 142 | 14  | 2   | 15  | 156,978,746 | 131,965,646           |
| Ovary replicate 1           | 0                                  | 1   | 48  | 3   | 0   | 5   | 100,356,244 | 90,380,428            |
| Ovary replicate 2           | 0                                  | 2   | 39  | 1   | 0   | 4   | 110,997,870 | 102,812,322           |
| Adrenal gland replicate 1   | 0                                  | 0   | 35  | 0   | 0   | 5   | 151,361,556 | 136,115,960           |
| Adrenal gland replicate 2   | 0                                  | 0   | 12  | 0   | 0   | 1   | 145,222,694 | 126,195,250           |

B

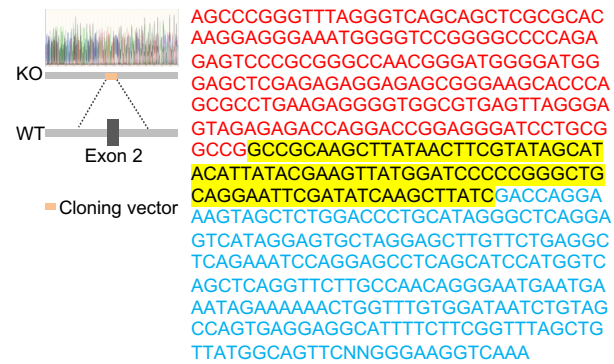

**Supplementary Figure S1. *Hs6st2* KO mice. (A)** Numbers of junction reads. **(B)** Sanger sequencing results of the *Hs6st2* KO mice. Red sequences, DNA sequences of the upstream intron of exon 2. Blue sequences, DNA sequences of the downstream intron of exon 2. Yellow highlighted sequences, the cloning vector sequences.
