# Supplementary material
Source: PubMed Central journal article supplement (PMC10969535)
Supplement: supplemental_figure_s2_cwad095.pdf [file supplemental_figure_s2_cwad095.pdf]

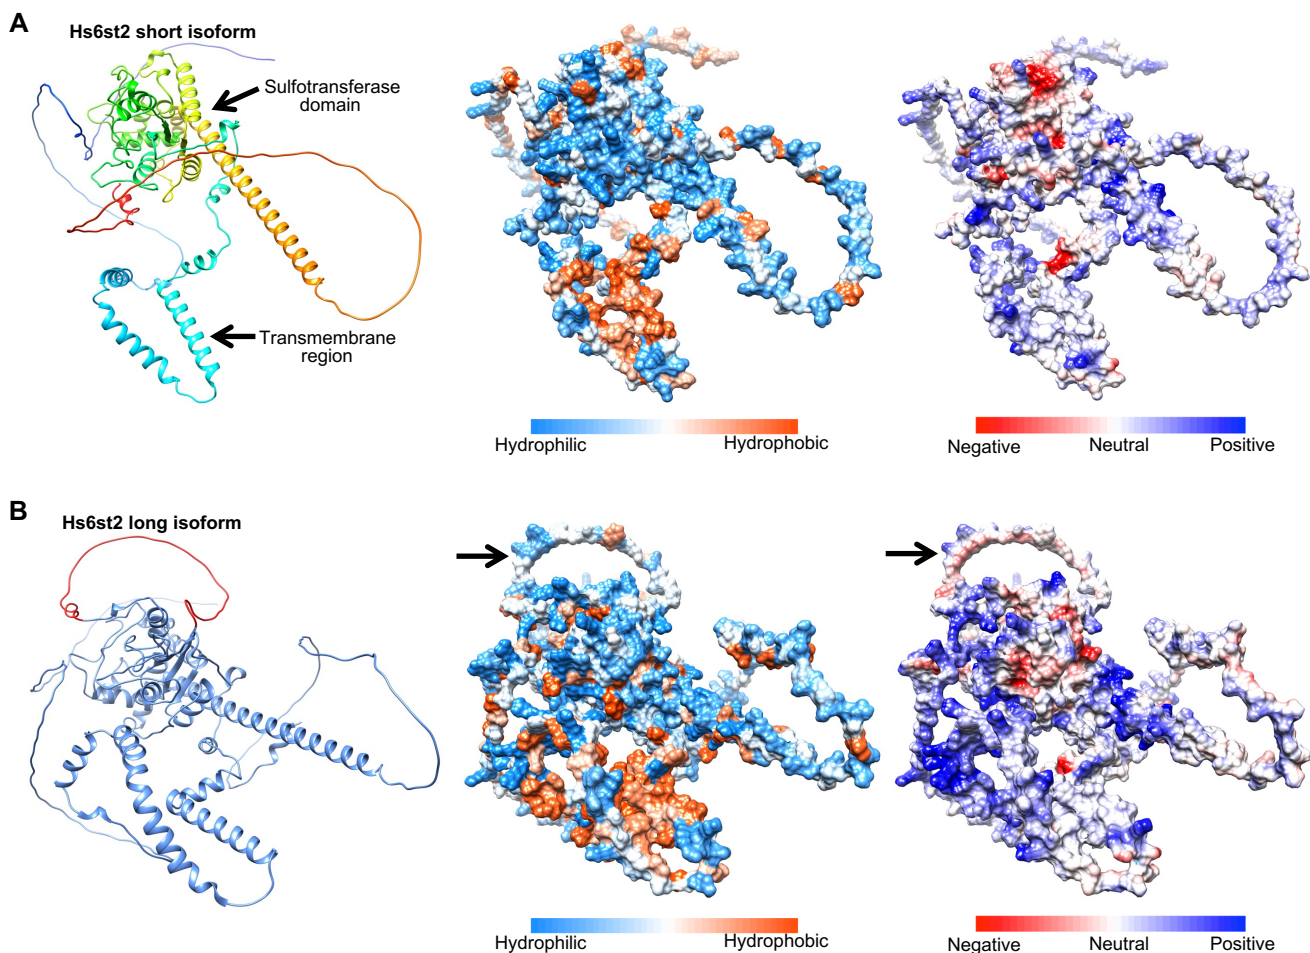

**Supplementary Figure S2.** Protein structures of the Hs6st2 short and long protein isoforms predicted by AlphaFold2. **(A)** Three-dimensional protein structure (left), hydrophobicity (middle), and electrostatic potential (right) of the Hs6st2 short protein isoform. **(B)** Three-dimensional protein structure (left), hydrophobicity (middle), and electrostatic potential (right) of the Hs6st2 long protein isoform. The amino acids encoded by exon 3 and exon 4 are highlighted in red in the left panel and indicated by the black arrows in the middle and right panels.
