# Supplementary material
Source: PubMed Central journal article supplement (PMC10969535)
Supplement: supplemental_figure_s3_cwad095.pdf [file supplemental_figure_s3_cwad095.pdf]

**A**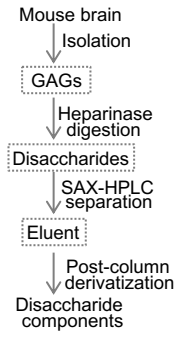**B**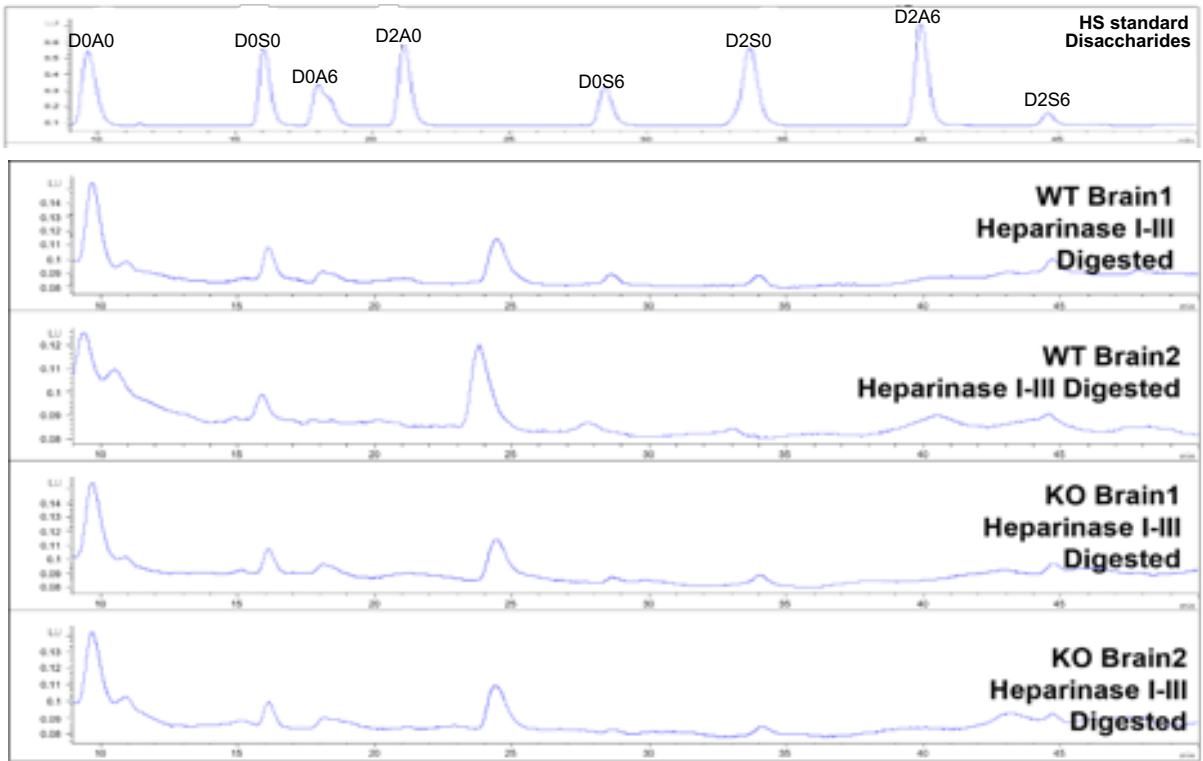

**Supplementary Figure S3. SAX-HPLC. (A)** Diagram showing the SAX-HPLC process. **(B)** SAX-HPLC chromatographs.
