# Supplementary material
Source: PubMed Central journal article supplement (PMC10969535)
Supplement: supplemental_figure_s4_cwad095.pdf [file supplemental_figure_s4_cwad095.pdf]

**A**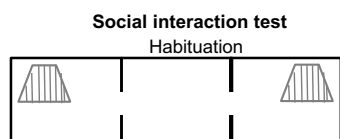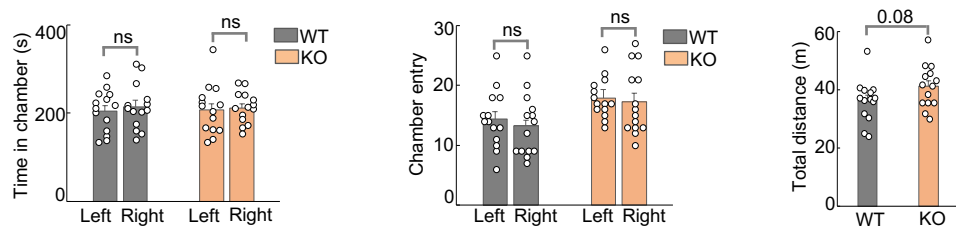**B**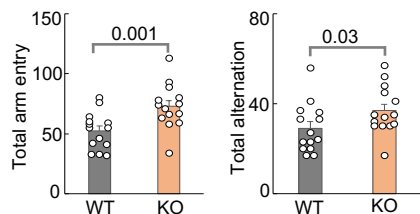**C**

**Novel object recognition test**  
Two identical objects

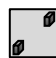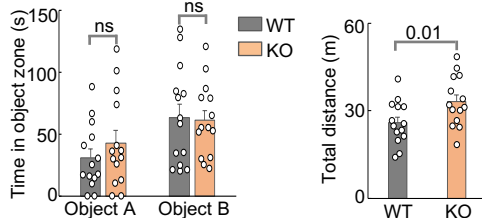**D**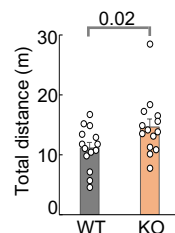

**Supplementary Figure S4.** Behavioral tests of *Hs6st2* KO mice. **(A)** Results of the habituation trial of the Social interaction test. Value on the line, *P*-value of two-tailed t-test. ns, *P*-value > 0.05. **(B)** Total are entry and alternation in Y-maze test. Values on the line, *P*-values of one-tailed t-test. **(C)** Results of the Novel object recognition test with two identical objects. Value on the line, *P*-value of one-tailed t-test. ns, *P* value > 0.05. **(D)** Total distance of the Novel object recognition test with a novel object. Value on the line, *P*-value of one-tailed t-test.
