# Supplementary material
Source: PubMed Central journal article supplement (PMC10969535)
Supplement: supplemental_figure_s5_cwad095.pdf [file supplemental_figure_s5_cwad095.pdf]

**A**

|                 |                | Total read pairs | Uniquely mapped read pairs | Mapping percentage |
|-----------------|----------------|------------------|----------------------------|--------------------|
| Cerebral Cortex | WT replicate 1 | 28,102,665       | 24,318,003                 | 86.53%             |
|                 | WT replicate 2 | 27,102,919       | 24,154,095                 | 89.12%             |
|                 | WT replicate 3 | 32,585,954       | 29,405,609                 | 90.24%             |
|                 | WT replicate 4 | 23,894,007       | 21,564,796                 | 90.25%             |
|                 | KO replicate 1 | 24,242,859       | 21,094,974                 | 87.02%             |
|                 | KO replicate 2 | 22,746,125       | 20,286,938                 | 89.19%             |
|                 | KO replicate 3 | 23,093,721       | 21,058,733                 | 91.19%             |
|                 | Hippocampus    | WT replicate 1   | 31,441,920                 | 28,075,316         |
| WT replicate 2  |                | 25,410,893       | 22,790,990                 | 89.69%             |
| WT replicate 3  |                | 33,556,029       | 30,038,272                 | 89.52%             |
| WT replicate 4  |                | 31,606,315       | 28,258,328                 | 89.41%             |
| KO replicate 1  |                | 33,575,705       | 29,892,918                 | 89.03%             |
| KO replicate 2  |                | 36,942,357       | 32,913,726                 | 89.09%             |
| KO replicate 3  |                | 50,485,261       | 44,736,419                 | 88.61%             |
| KO replicate 4  |                | 31,343,042       | 27,833,110                 | 88.80%             |

**B**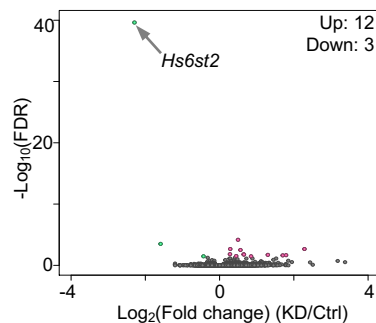**C**

| Symbol   | Log2FC | FDR        |
|----------|--------|------------|
| Hs6st2   | -2.29  | 2.36E-40   |
| Slc5a3   | 0.49   | 6.77E-05   |
| Gm22486  | -1.58  | 0.00031366 |
| Hspa5    | 0.28   | 0.00215617 |
| Ciita    | 2.28   | 0.00215617 |
| Dnajb1   | 0.56   | 0.00309162 |
| Dnaja1   | 0.27   | 0.014895   |
| Serpinh1 | 0.64   | 0.0160723  |
| Fos      | 0.65   | 0.01694837 |
| Parp14   | 1.30   | 0.0194798  |
| H2-Q6    | 1.79   | 0.02166806 |
| Hspa1b   | 1.70   | 0.02358706 |
| Jun      | 0.44   | 0.03001848 |
| Adora2a  | 0.84   | 0.03336295 |
| Fam214a  | -0.43  | 0.03336295 |

**Supplementary Figure S5.** RNA-seq results of *Hs6st2* KO mice. **(A)** Statistics of sequencing and mapping. **(B)** The volcano plot of the cerebral cortex RNA-seq data. **(C)** The differentially expressed genes in the cerebral cortex of *Hs6st2* KO mice.
