# Supplementary material
Source: PubMed Central journal article supplement (PMC10969535)
Supplement: supplemental_figure_s6_cwad095.pdf [file supplemental_figure_s6_cwad095.pdf]

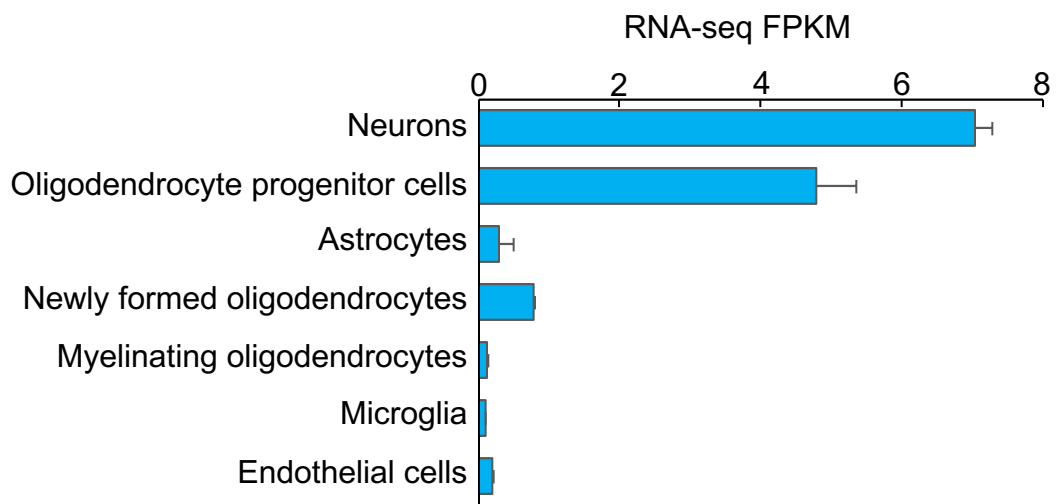

**Supplementary Figure S6.** RNA-seq expression levels (FPKM) of *Hs6st2* in seven cell types in the mouse brain. The FPKM values were obtained from the Brain RNA-Seq database (<https://www.brainrnaseq.org/>).
