# Supplementary material
Source: PubMed Central journal article supplement (PMC10969535)
Supplement: supplemental_figure_s7_cwad095.pdf [file supplemental_figure_s7_cwad095.pdf]

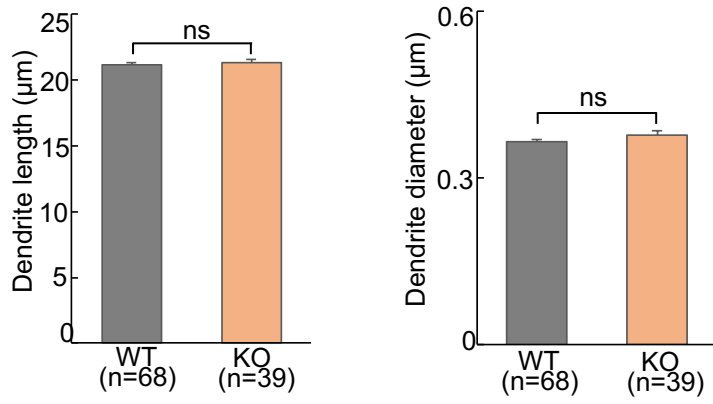

**Supplementary Figure S7.** The length and diameter of the quantified apical dendrite segments of hippocampal CA1 pyramidal neurons in the WT and *Hs6st2* KO mice. Statistics: ns, P-value > 0.05, two-tailed t-test.
